# Supplementary material for: Physicochemical characterization of segmented polyurethanes prepared with glutamine or ascorbic acid as chain extenders and their hydroxyapatite composites
Source: Royal Society of Chemistry journal article supplement (doi:10.1039/c3tb21500h), 2014-01-01
Supplement: c3tb21500h.pdf [file c3tb21500h.pdf]

Supplementary figures

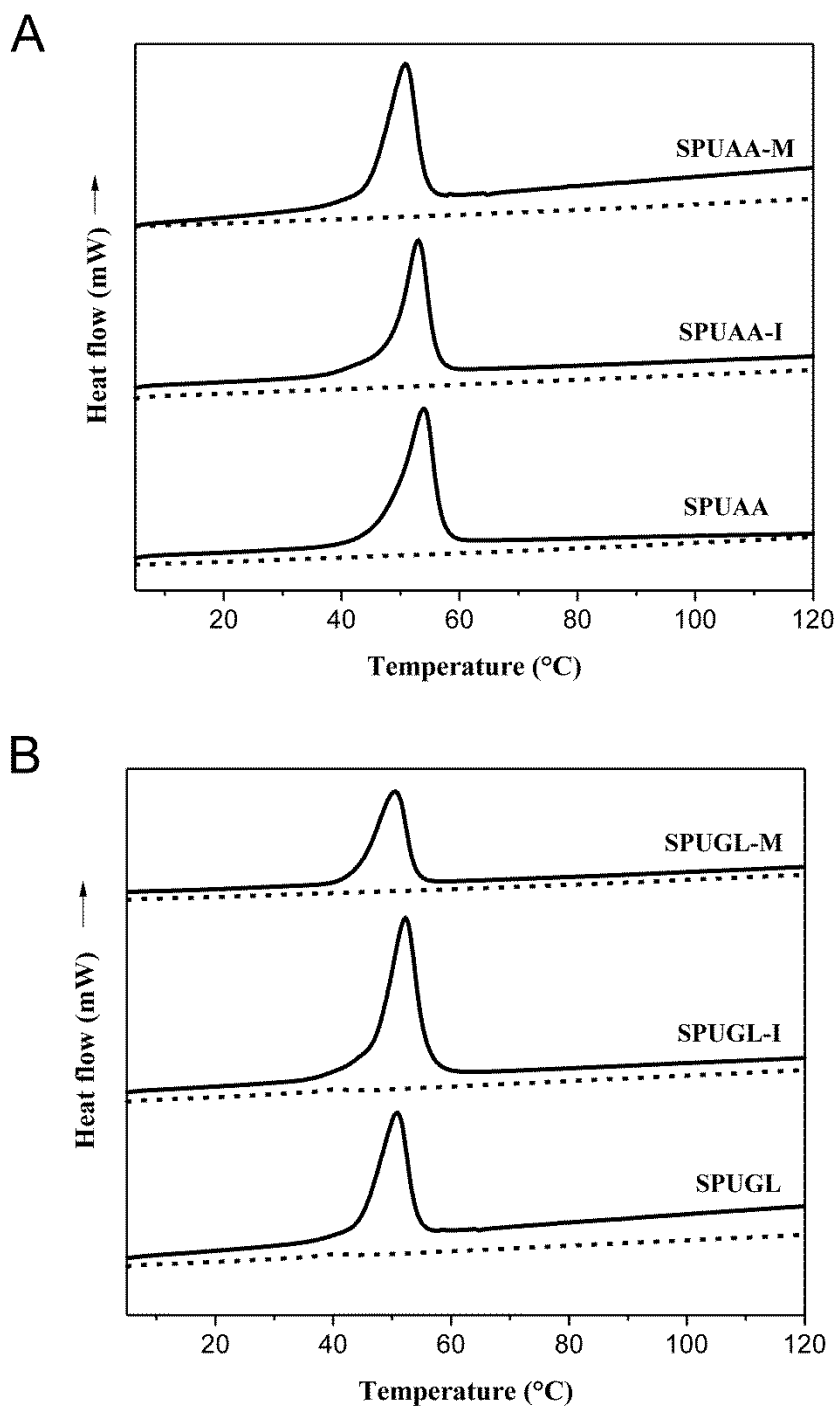

S-1. DSC Termograms. First (—) and second(----) heating

**Figure S1.** DSC thermograms for (a) SPUAA and their composites, and (b) SPUGL and their composites.

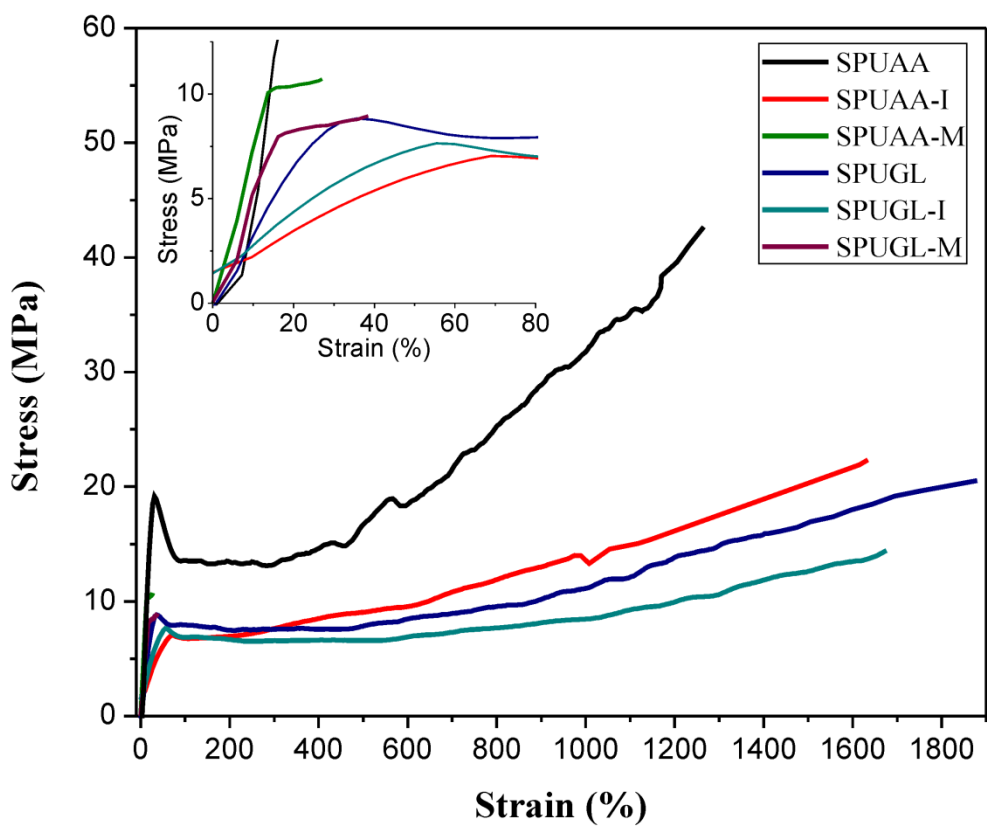

## S2. Stress-strain curves

**Figure S2.** Stress vs. strain curves for segmented polyurethanes and their composites.
